# Supplementary material
Source: PubMed Central journal article supplement (PMC3462298)

Ca<sup>2+</sup> D61N S100B

Ca<sup>2+</sup> D61N S100B + TRTK

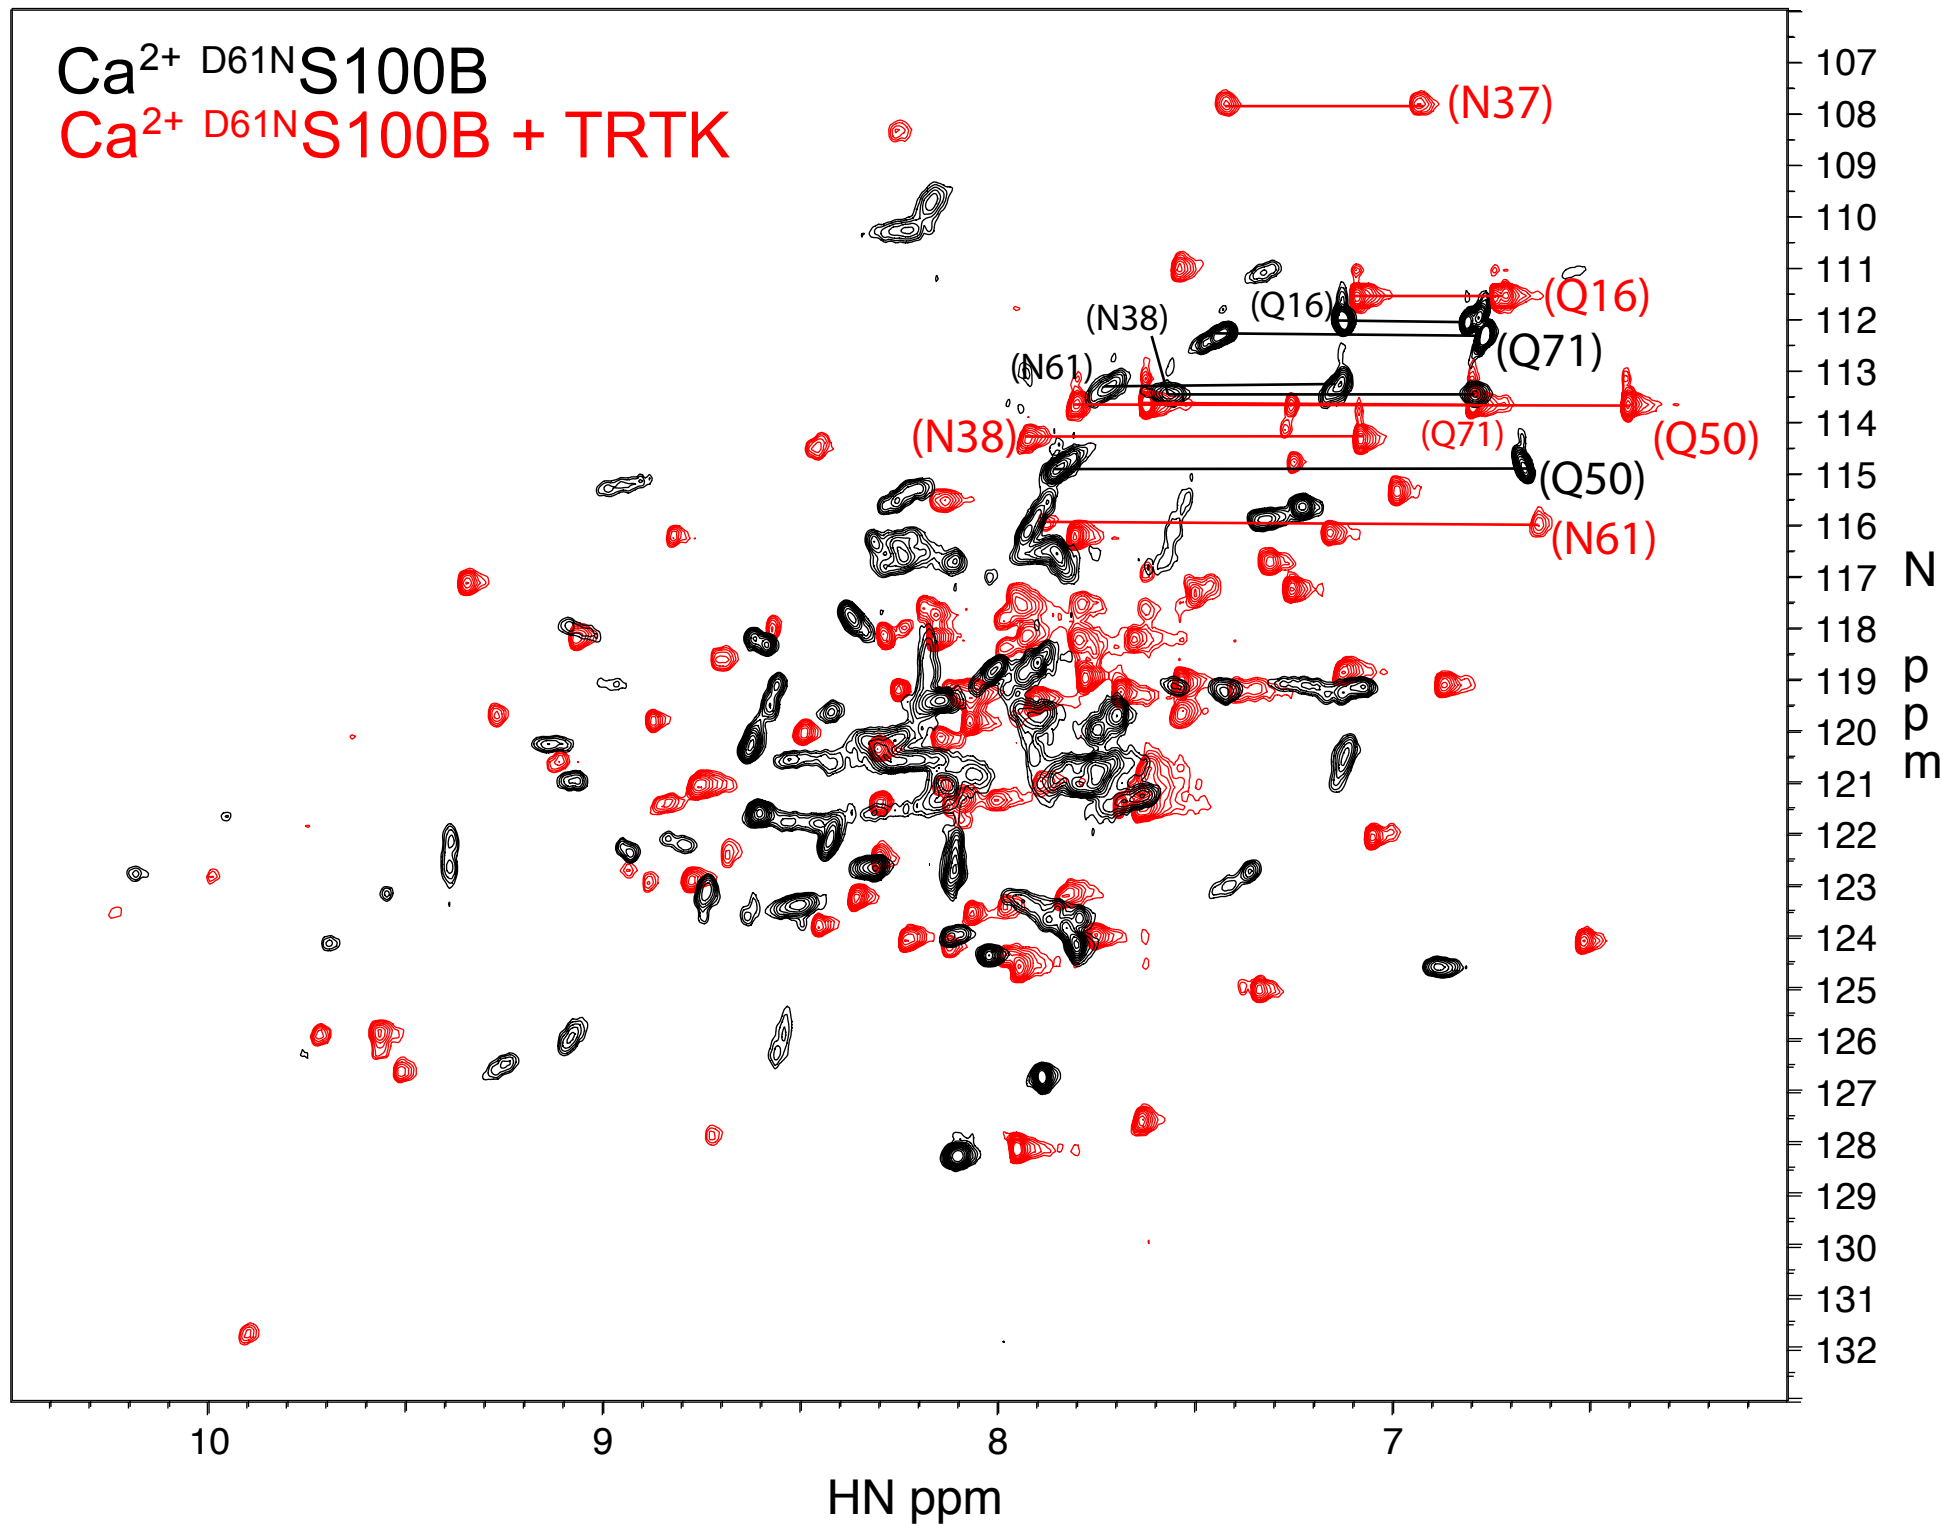

Supplement: NIHMS401518-supplement-01.pdf [file NIHMS401518-supplement-01.pdf]

Ca<sup>2+</sup> D63N S100B

Ca<sup>2+</sup> D63N S100B + TRTK

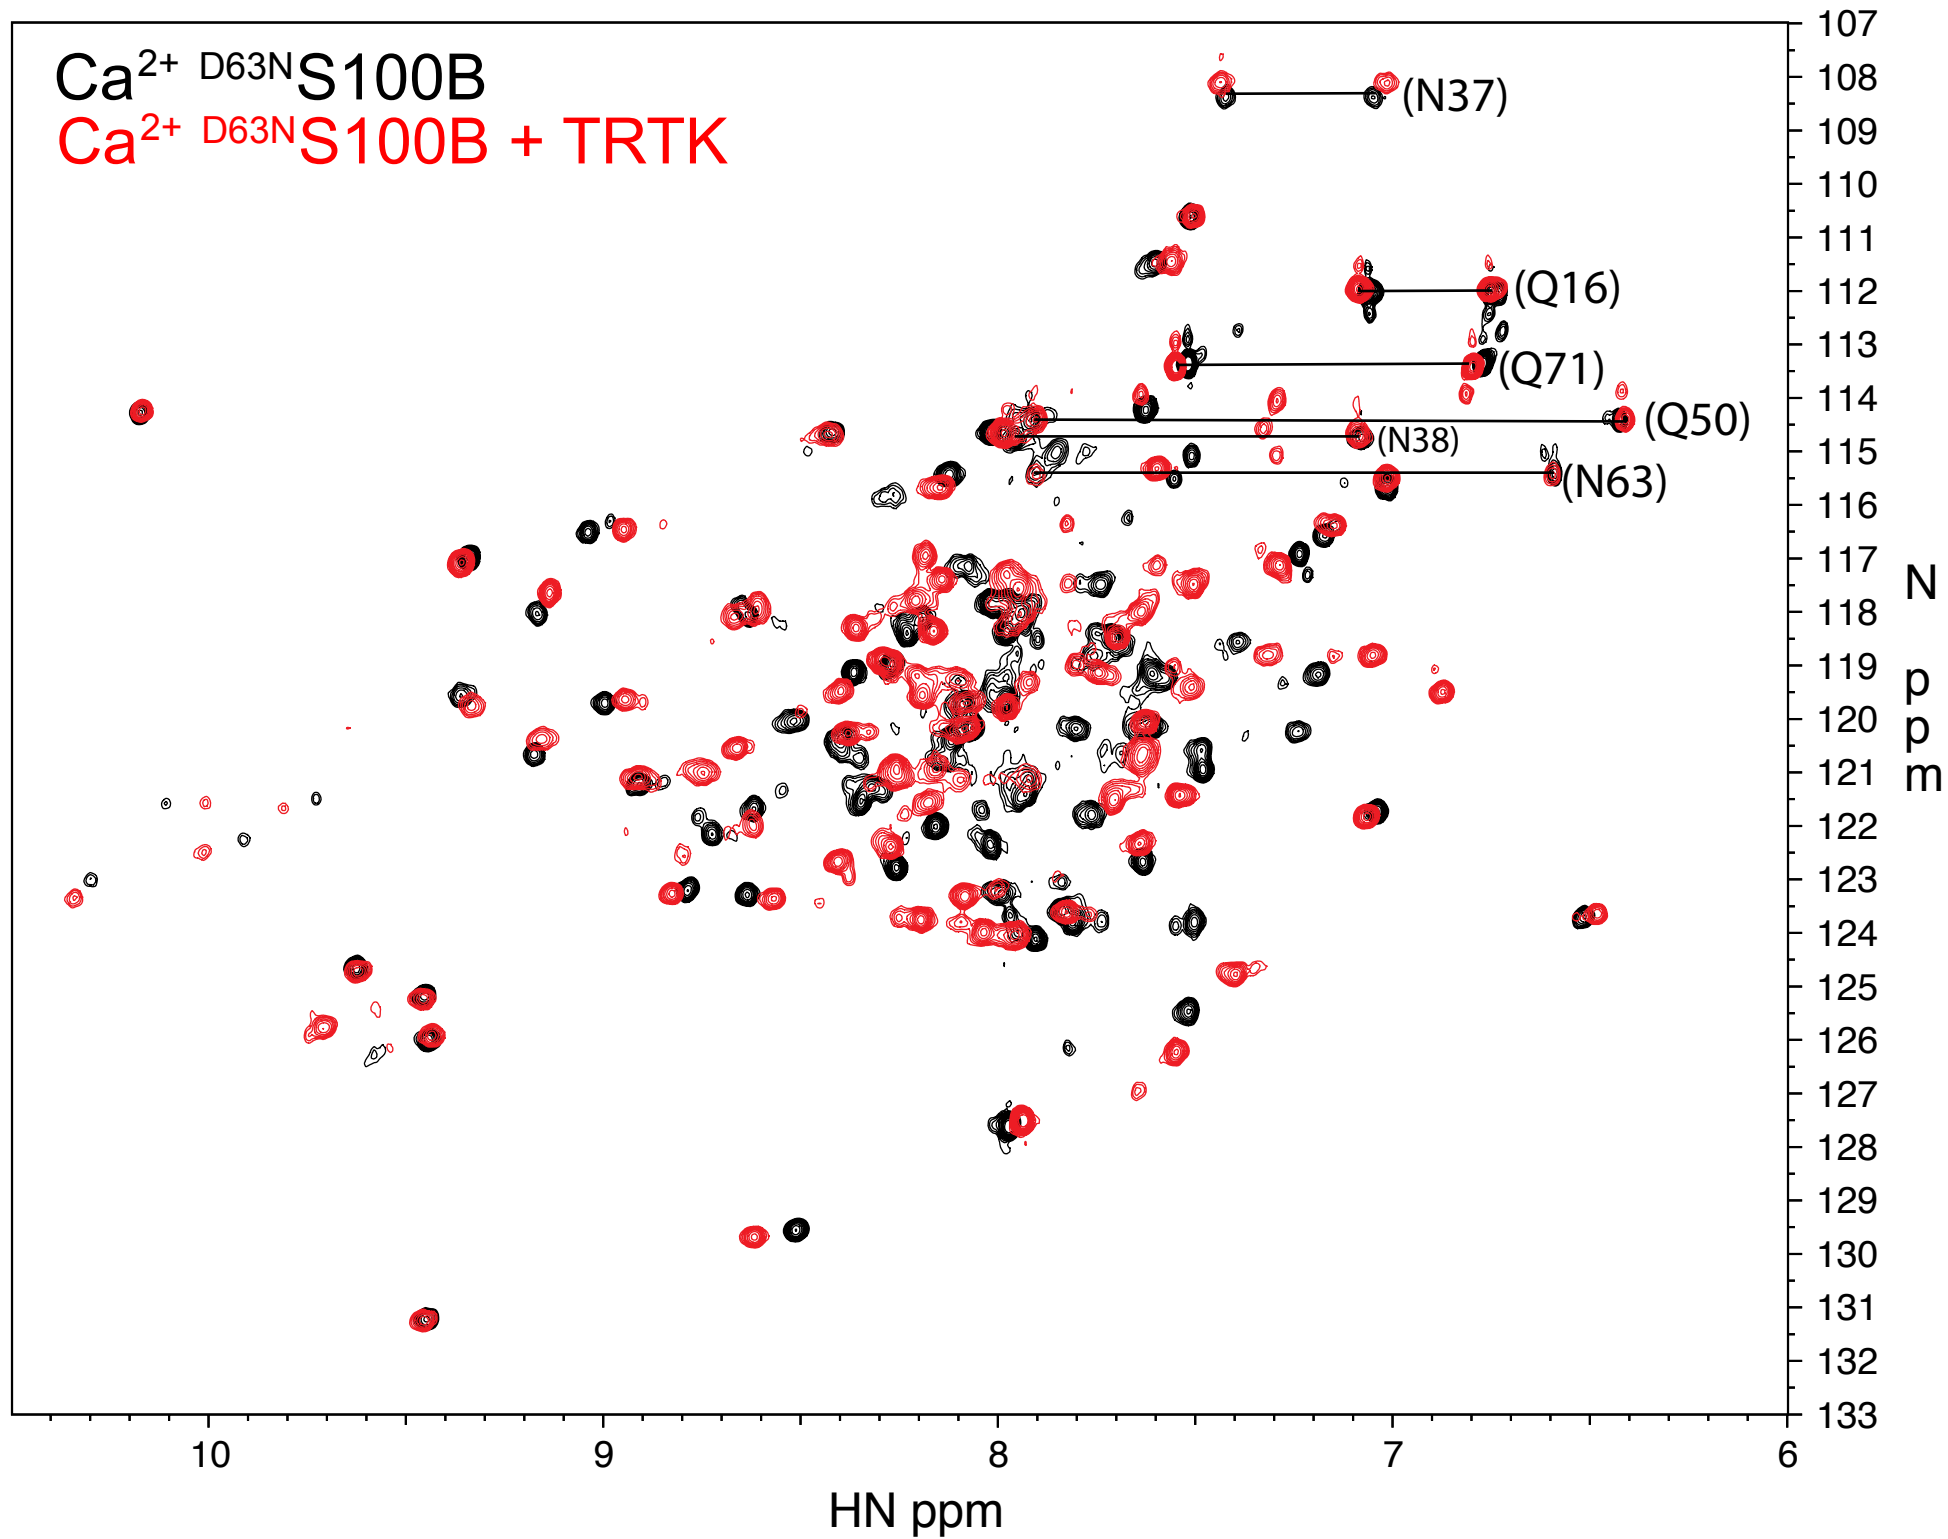

Supplement: NIHMS401518-supplement-02.pdf [file NIHMS401518-supplement-02.pdf]

Ca<sup>2+</sup> D65N S100B

Ca<sup>2+</sup> D65N S100B + TRTK

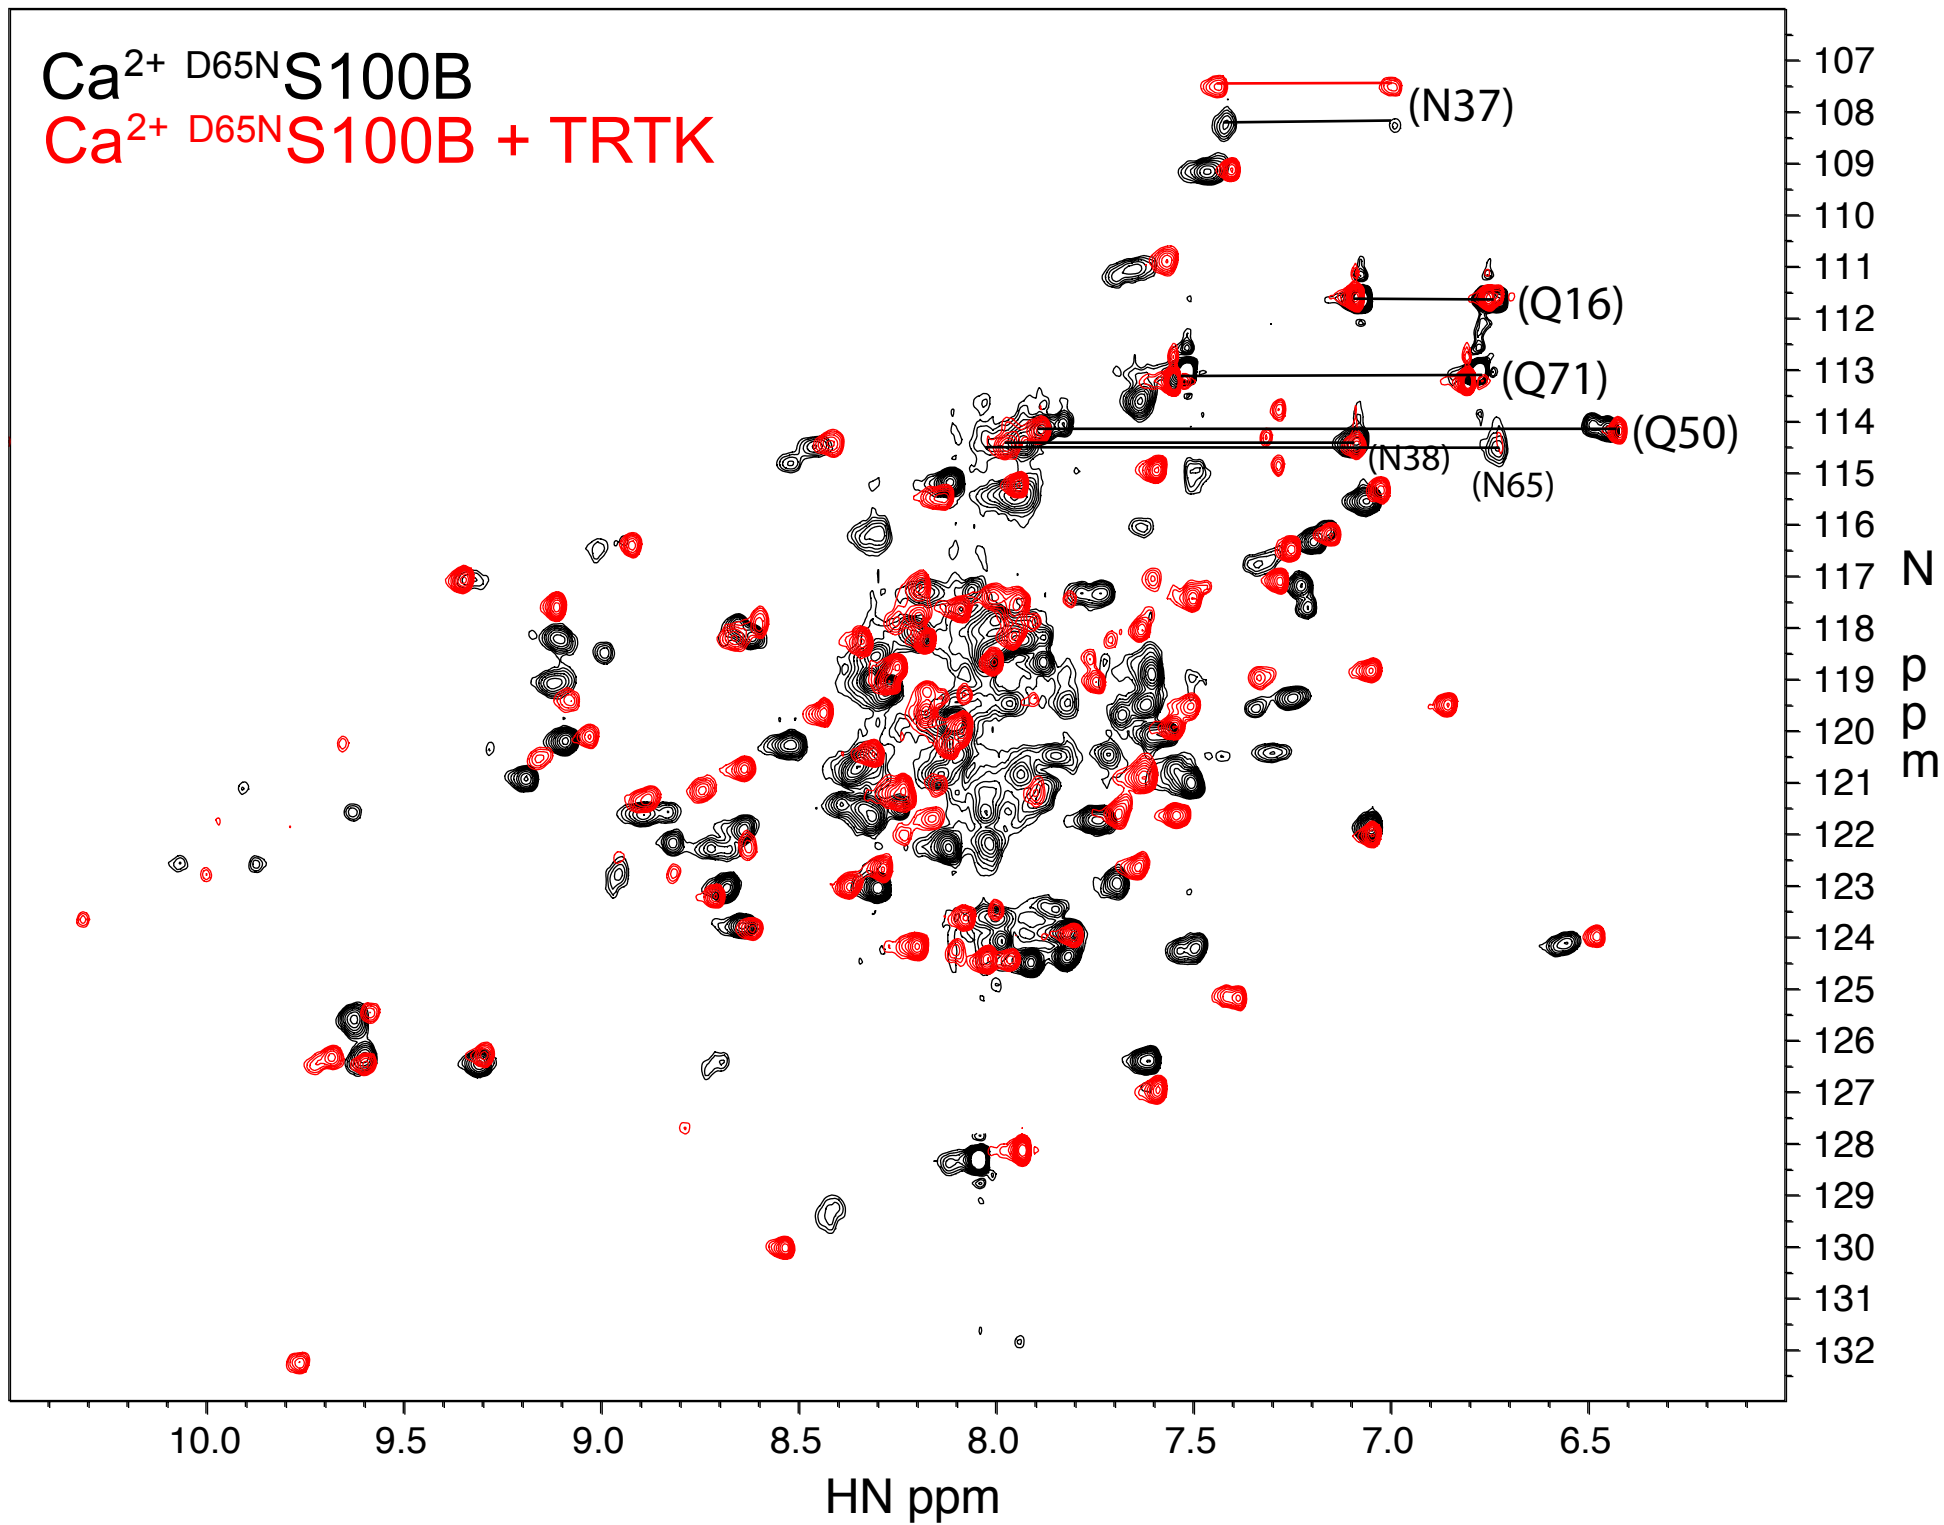

Supplement: NIHMS401518-supplement-03.pdf [file NIHMS401518-supplement-03.pdf]

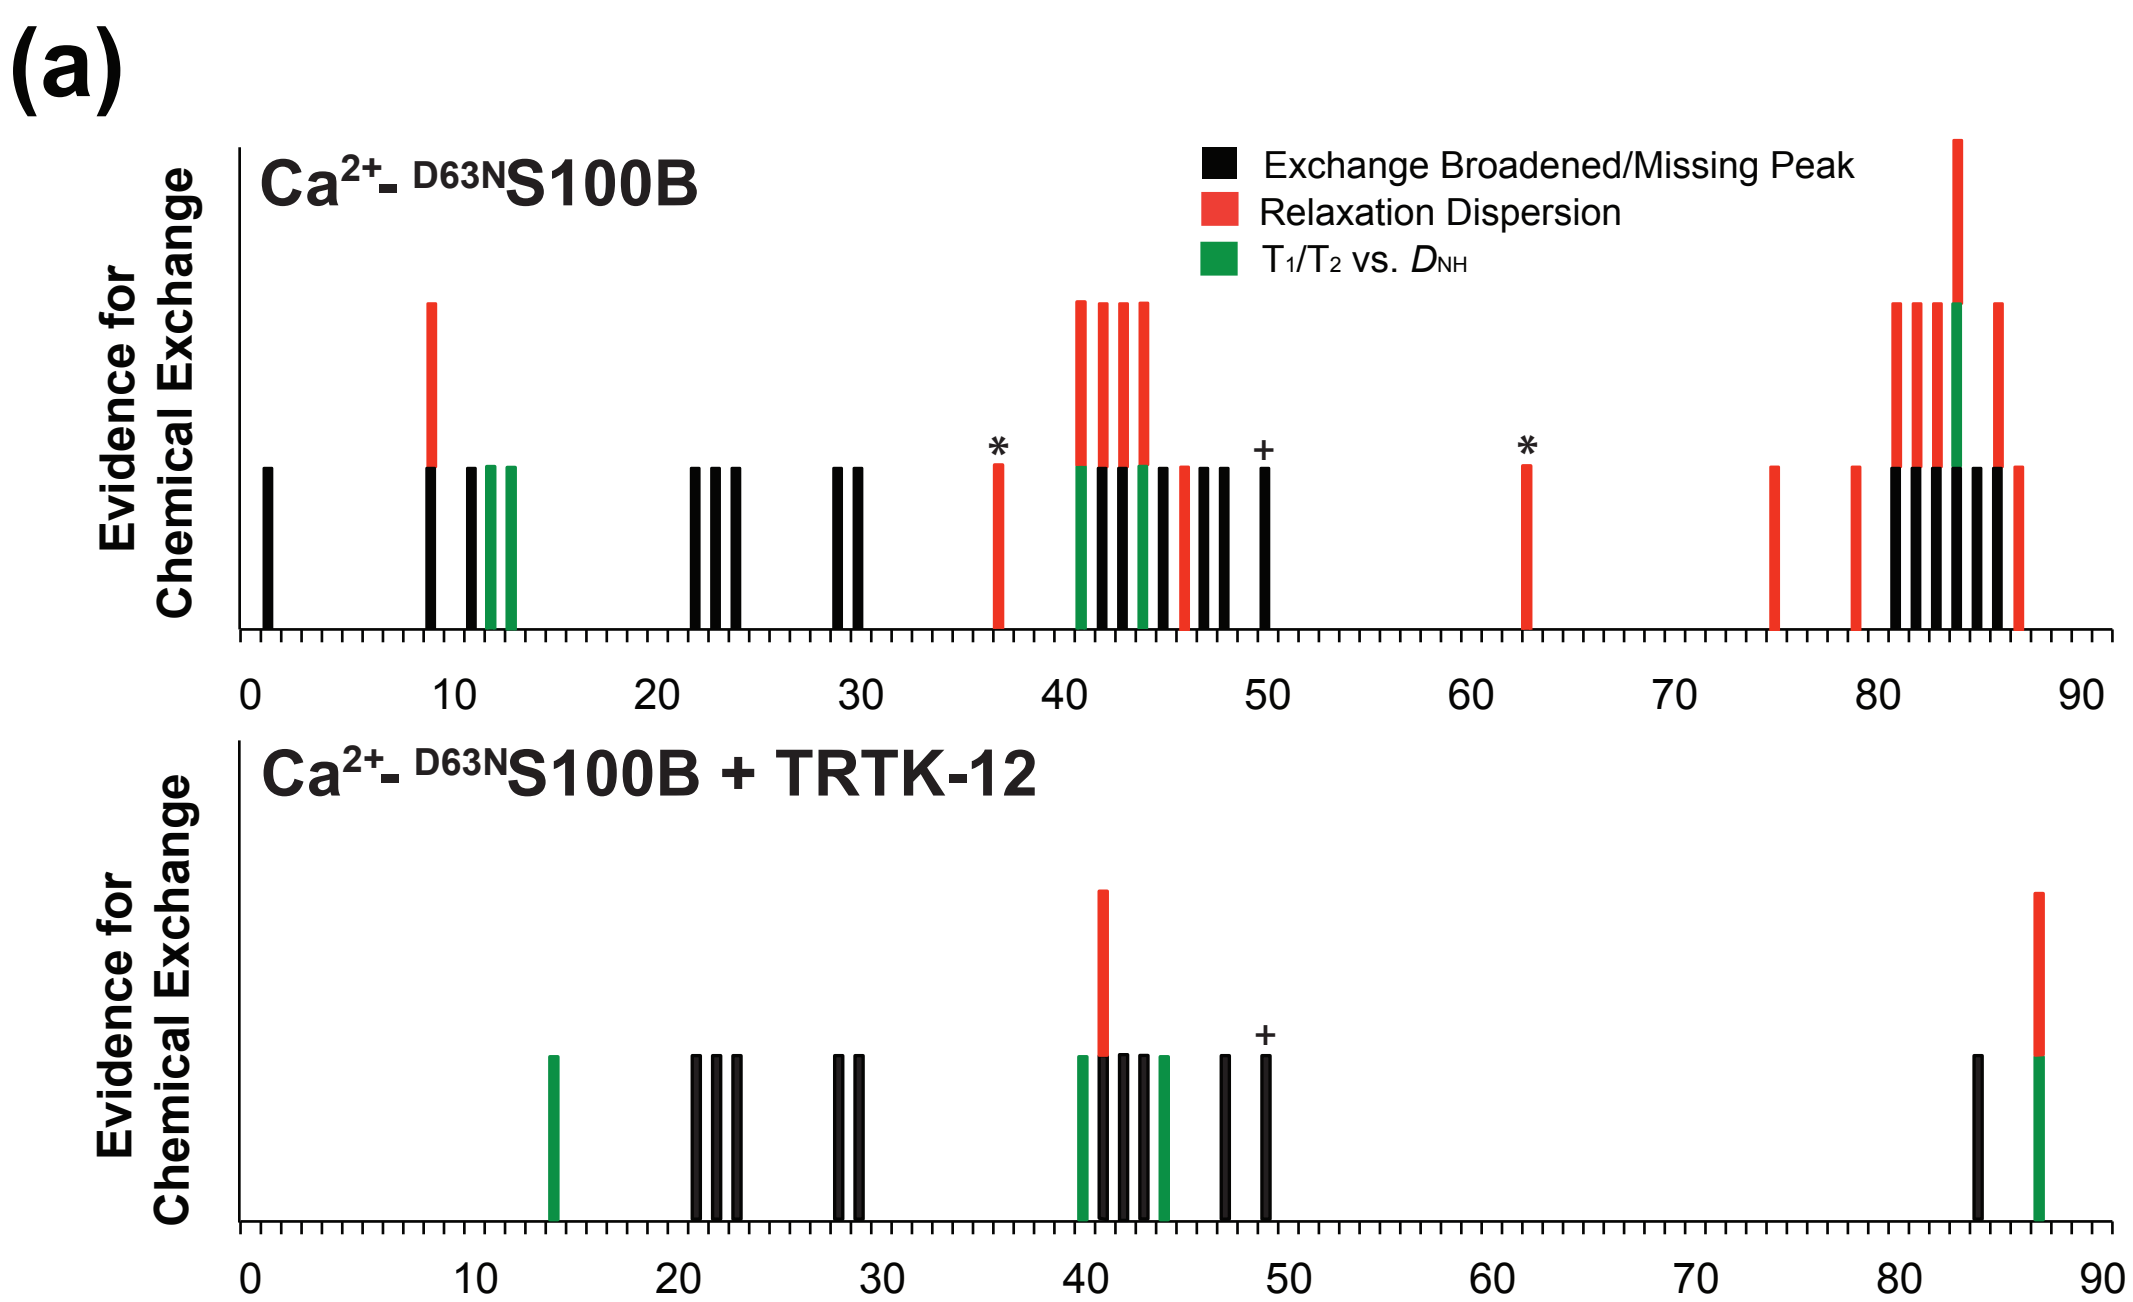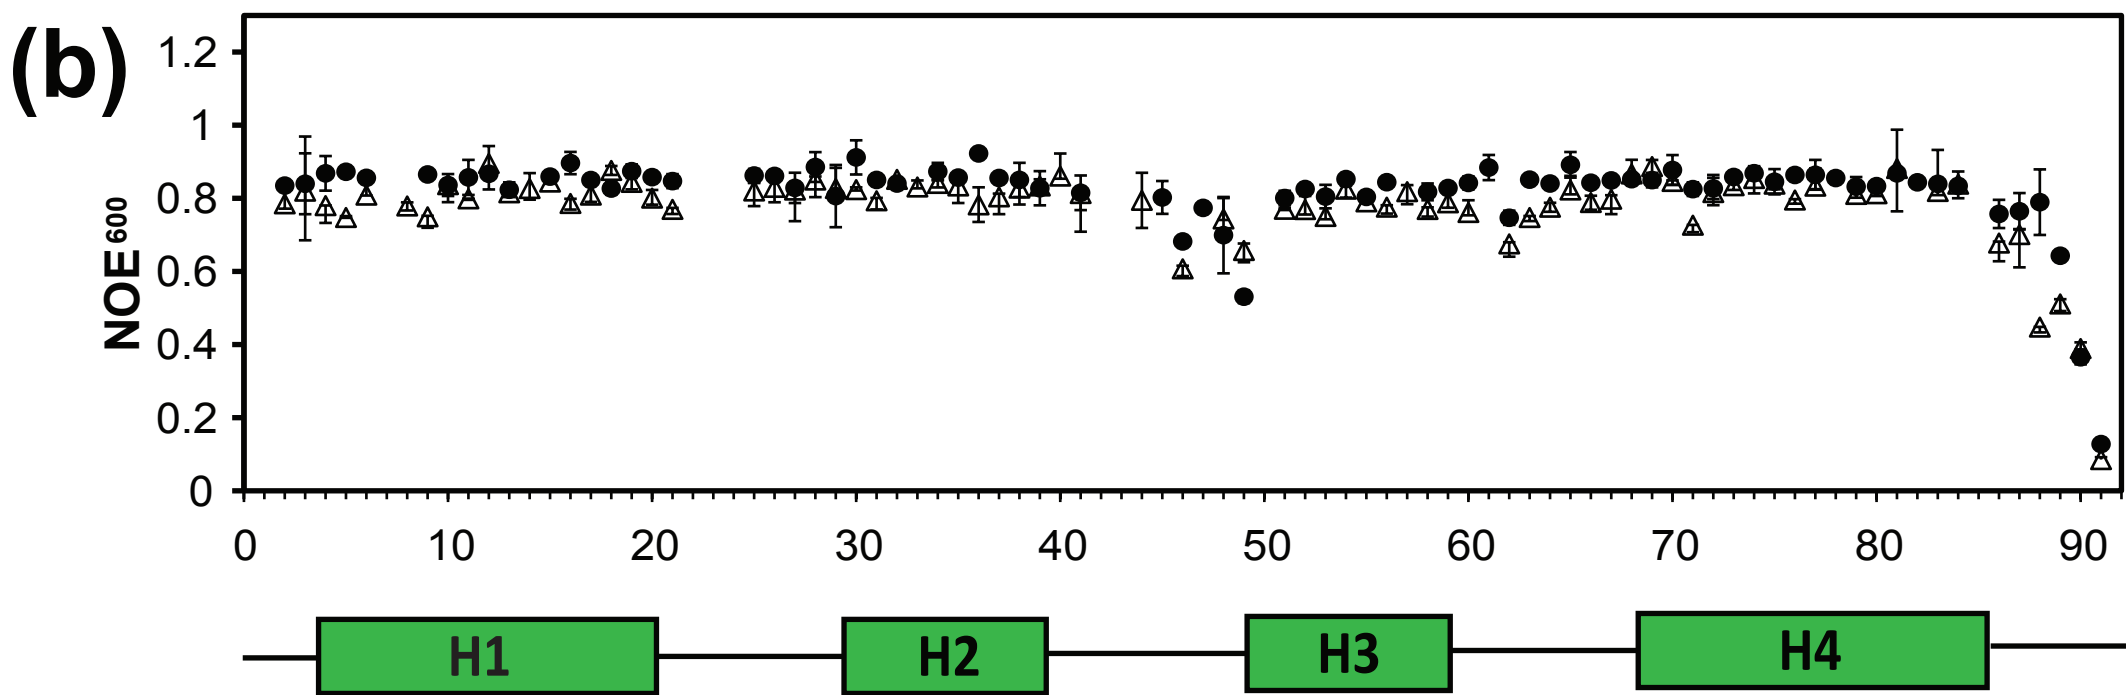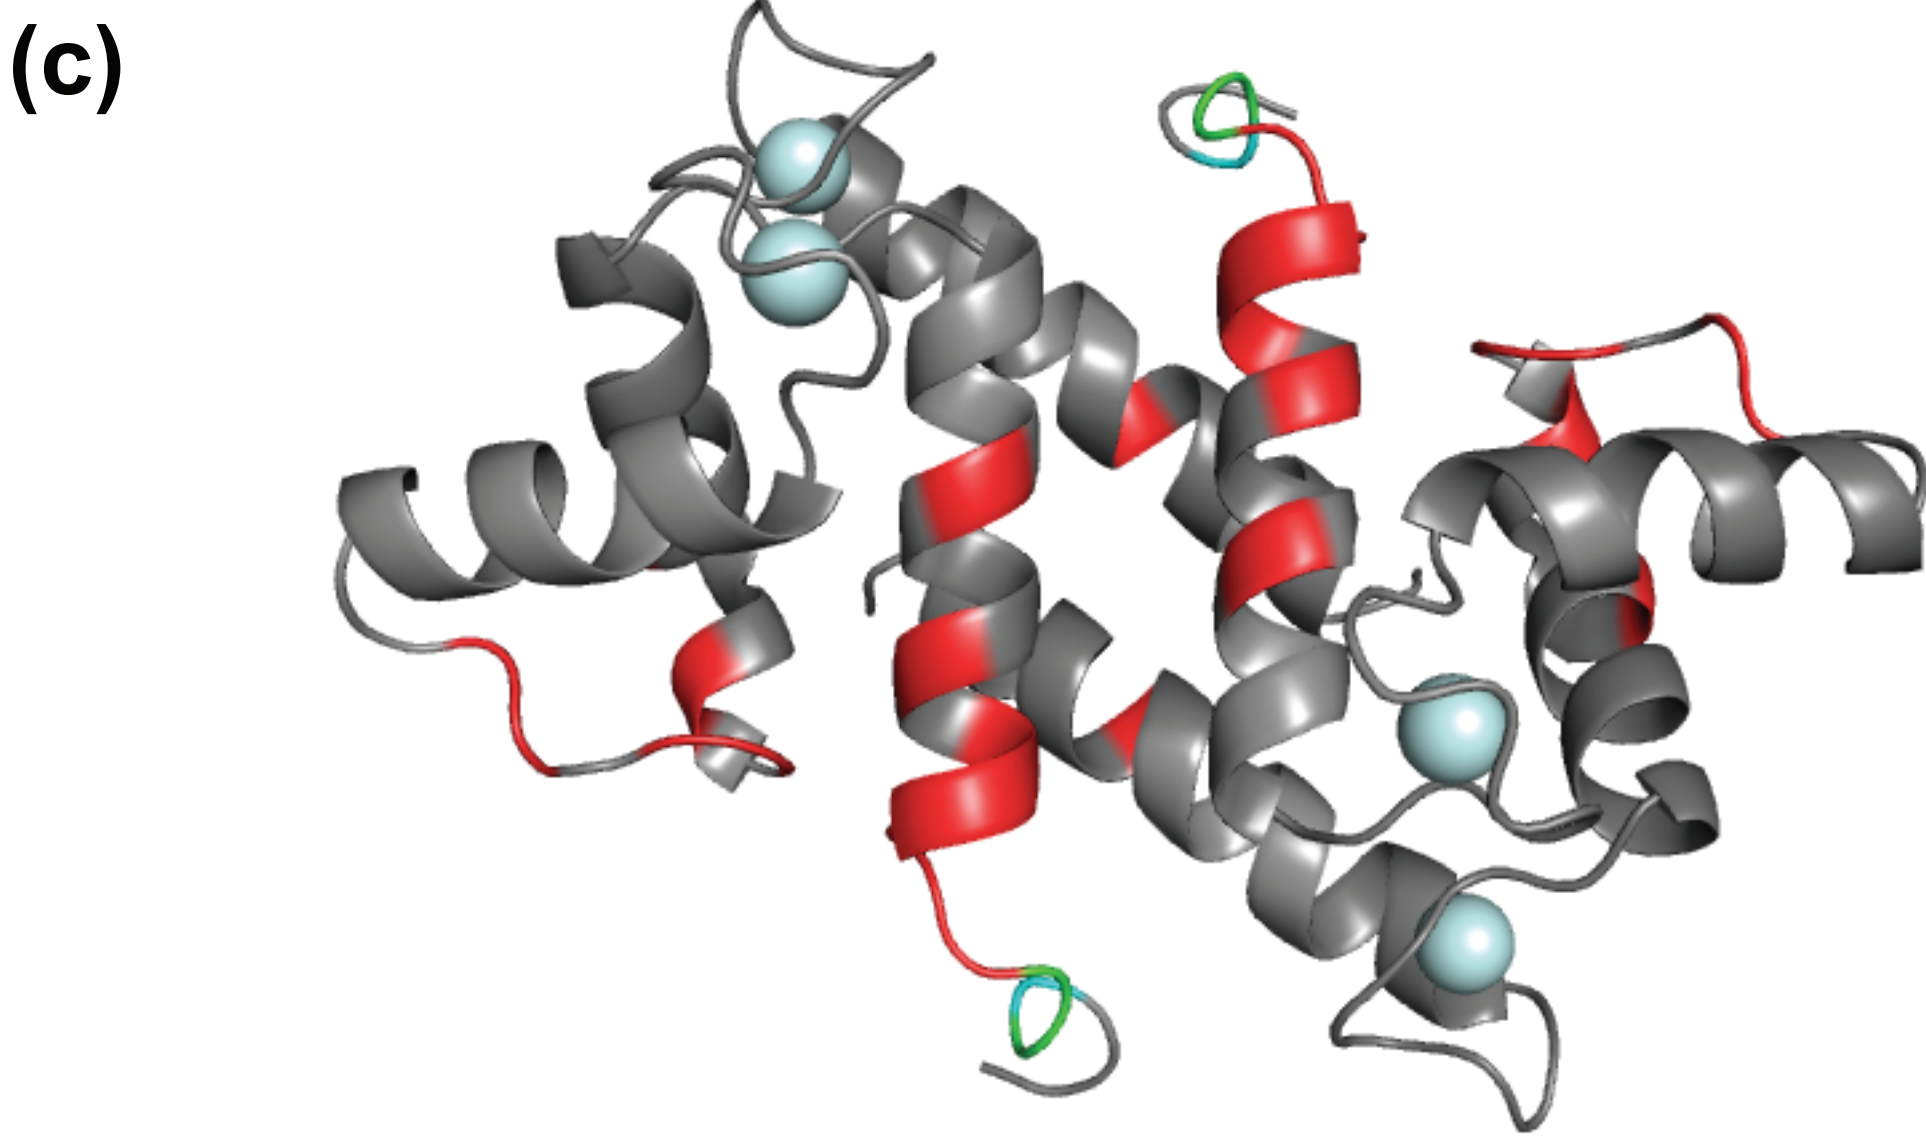

Supplement: NIHMS401518-supplement-04.pdf [file NIHMS401518-supplement-04.pdf]

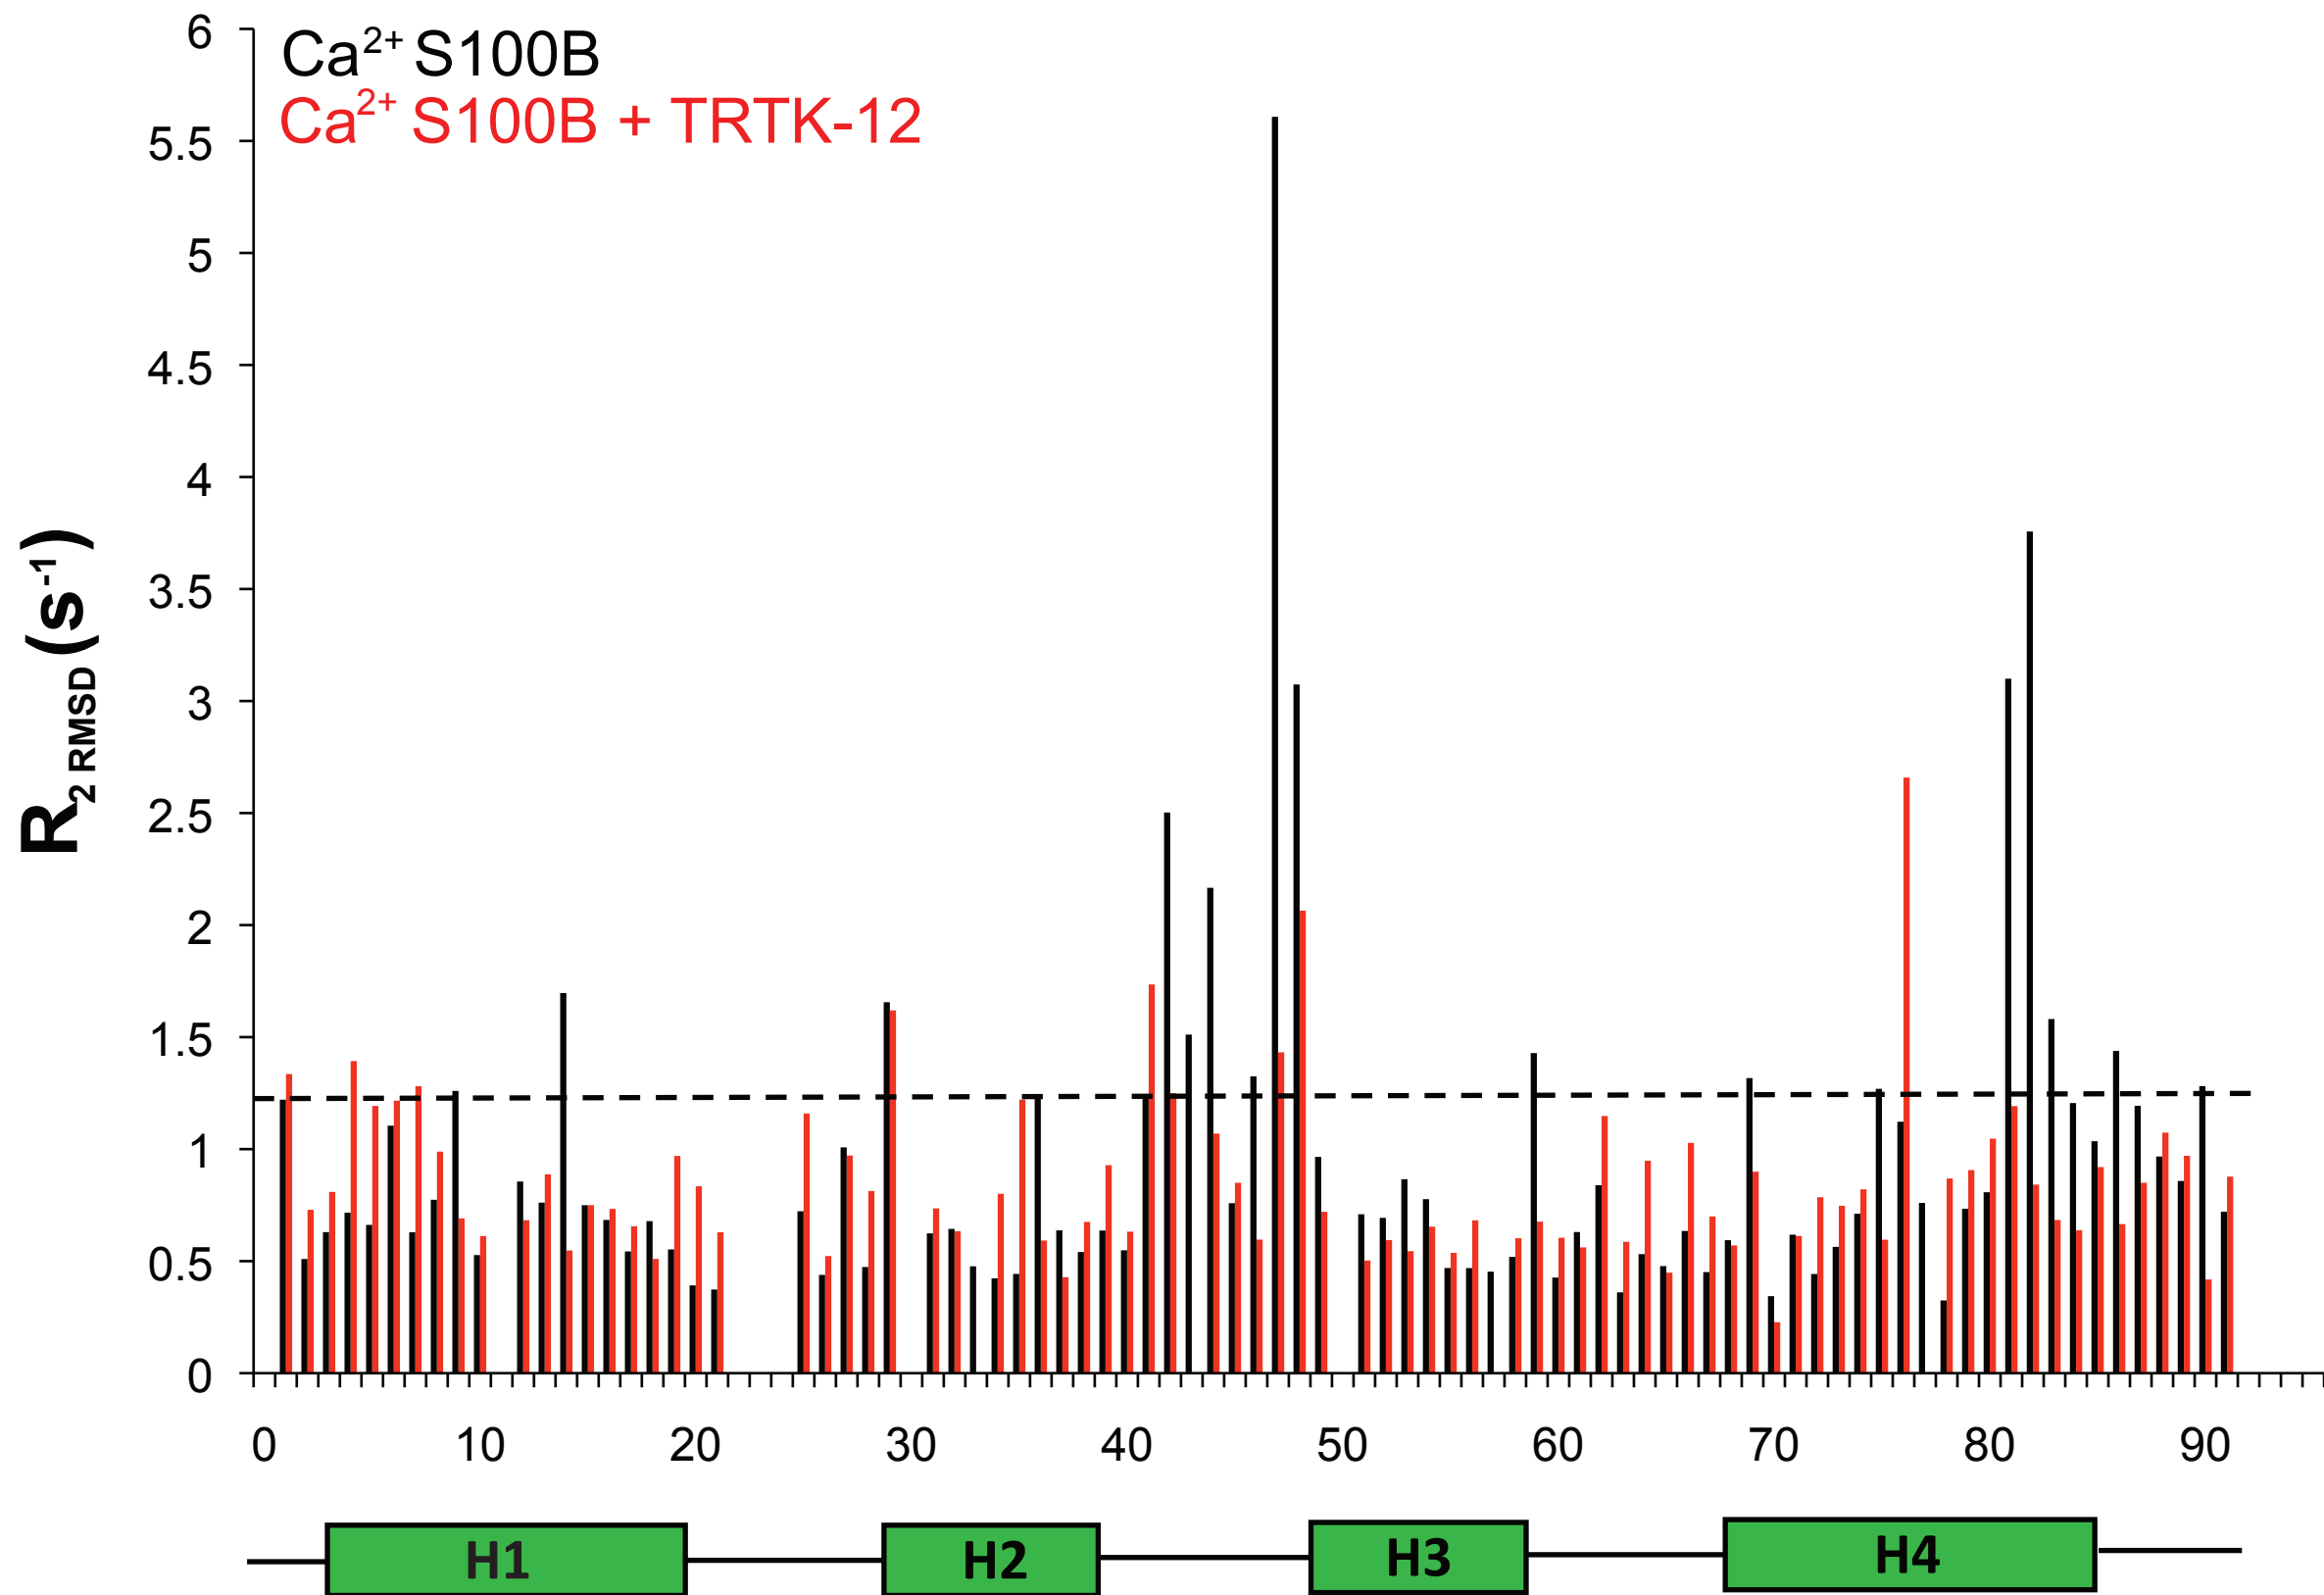

Supplement: NIHMS401518-supplement-05.pdf [file NIHMS401518-supplement-05.pdf]

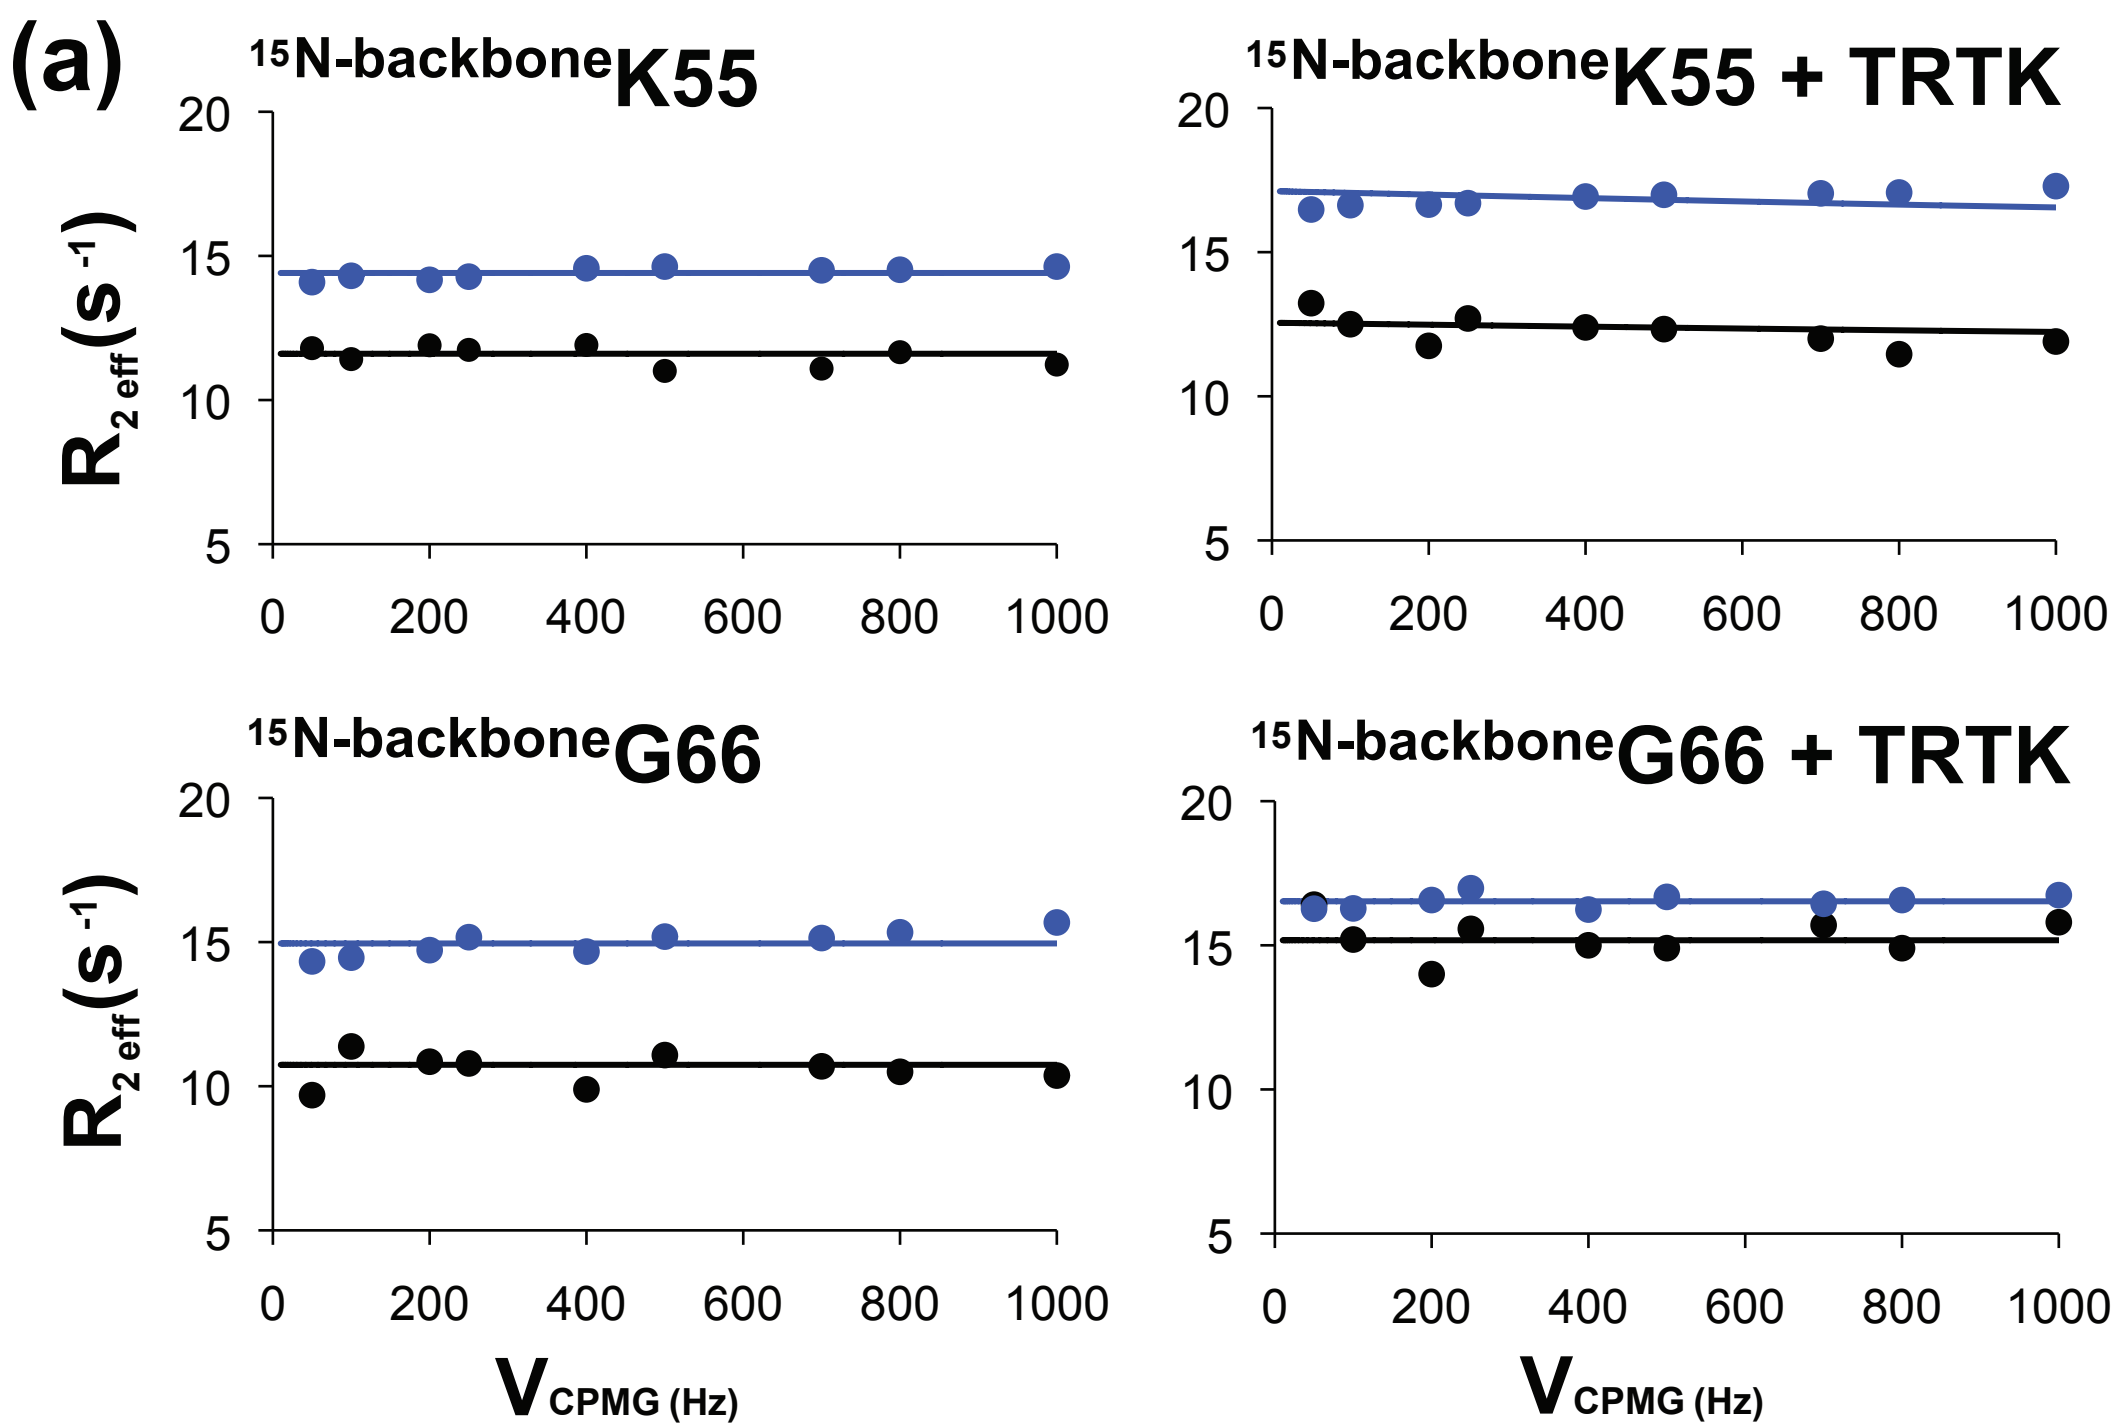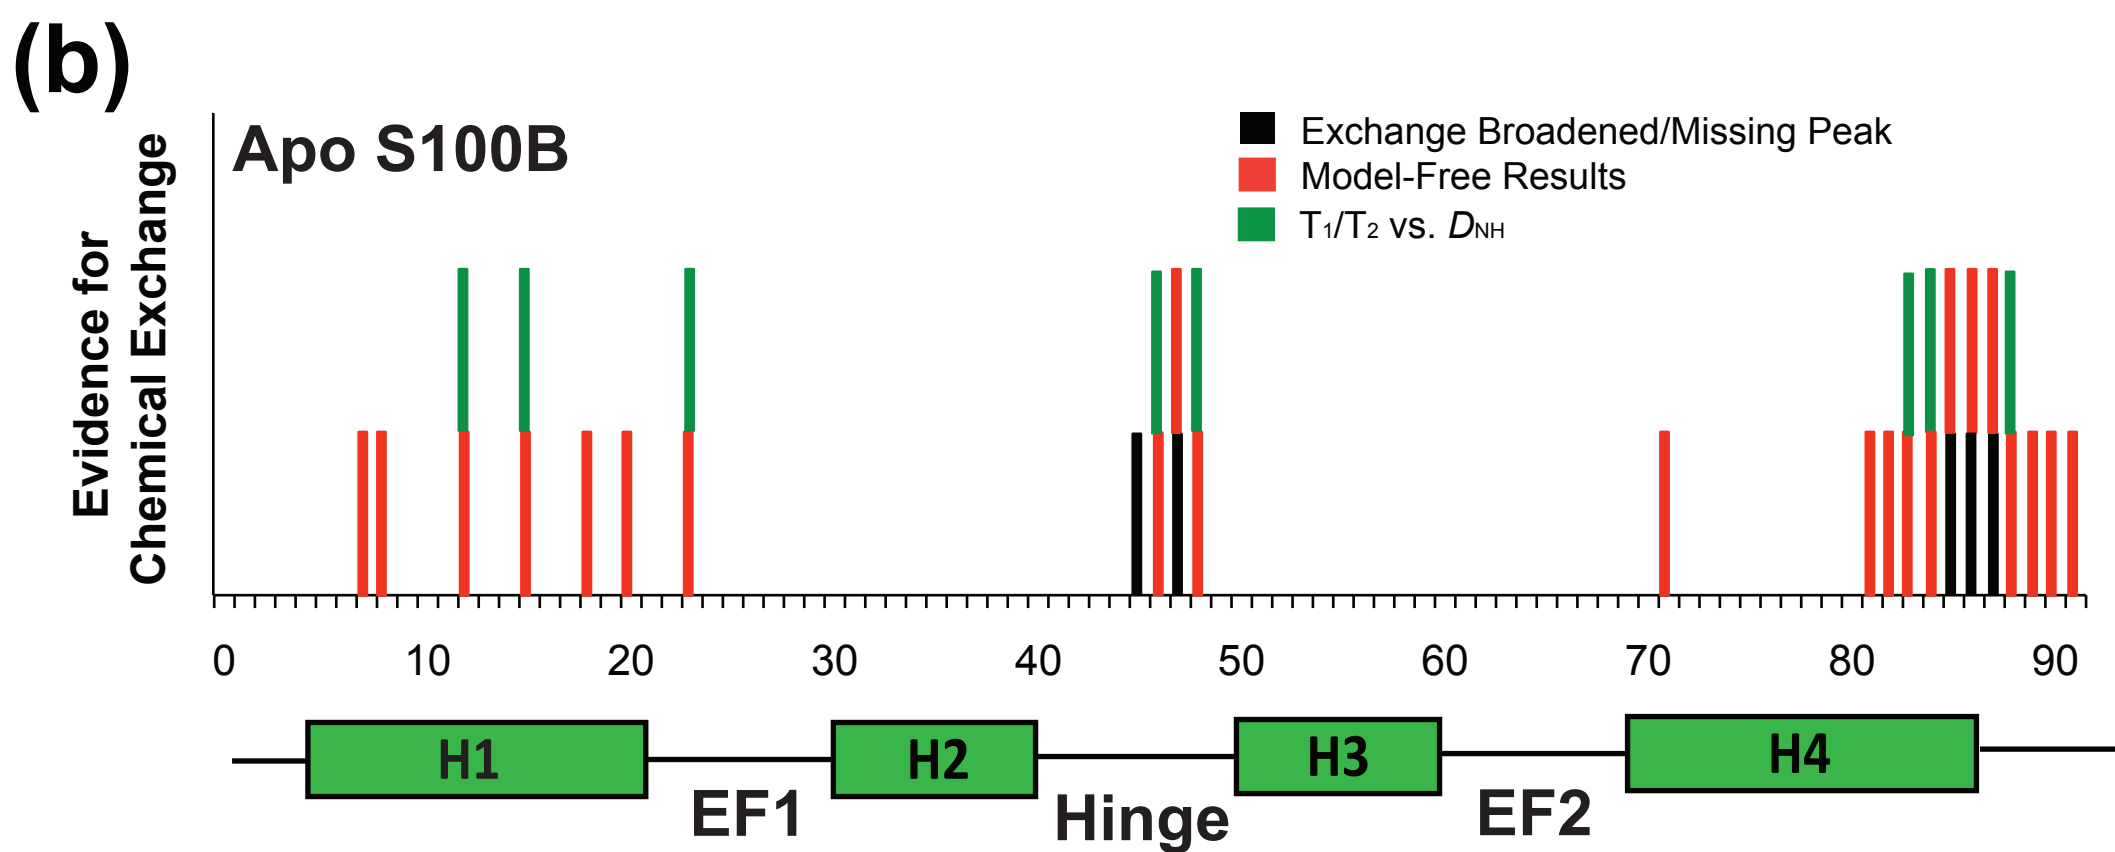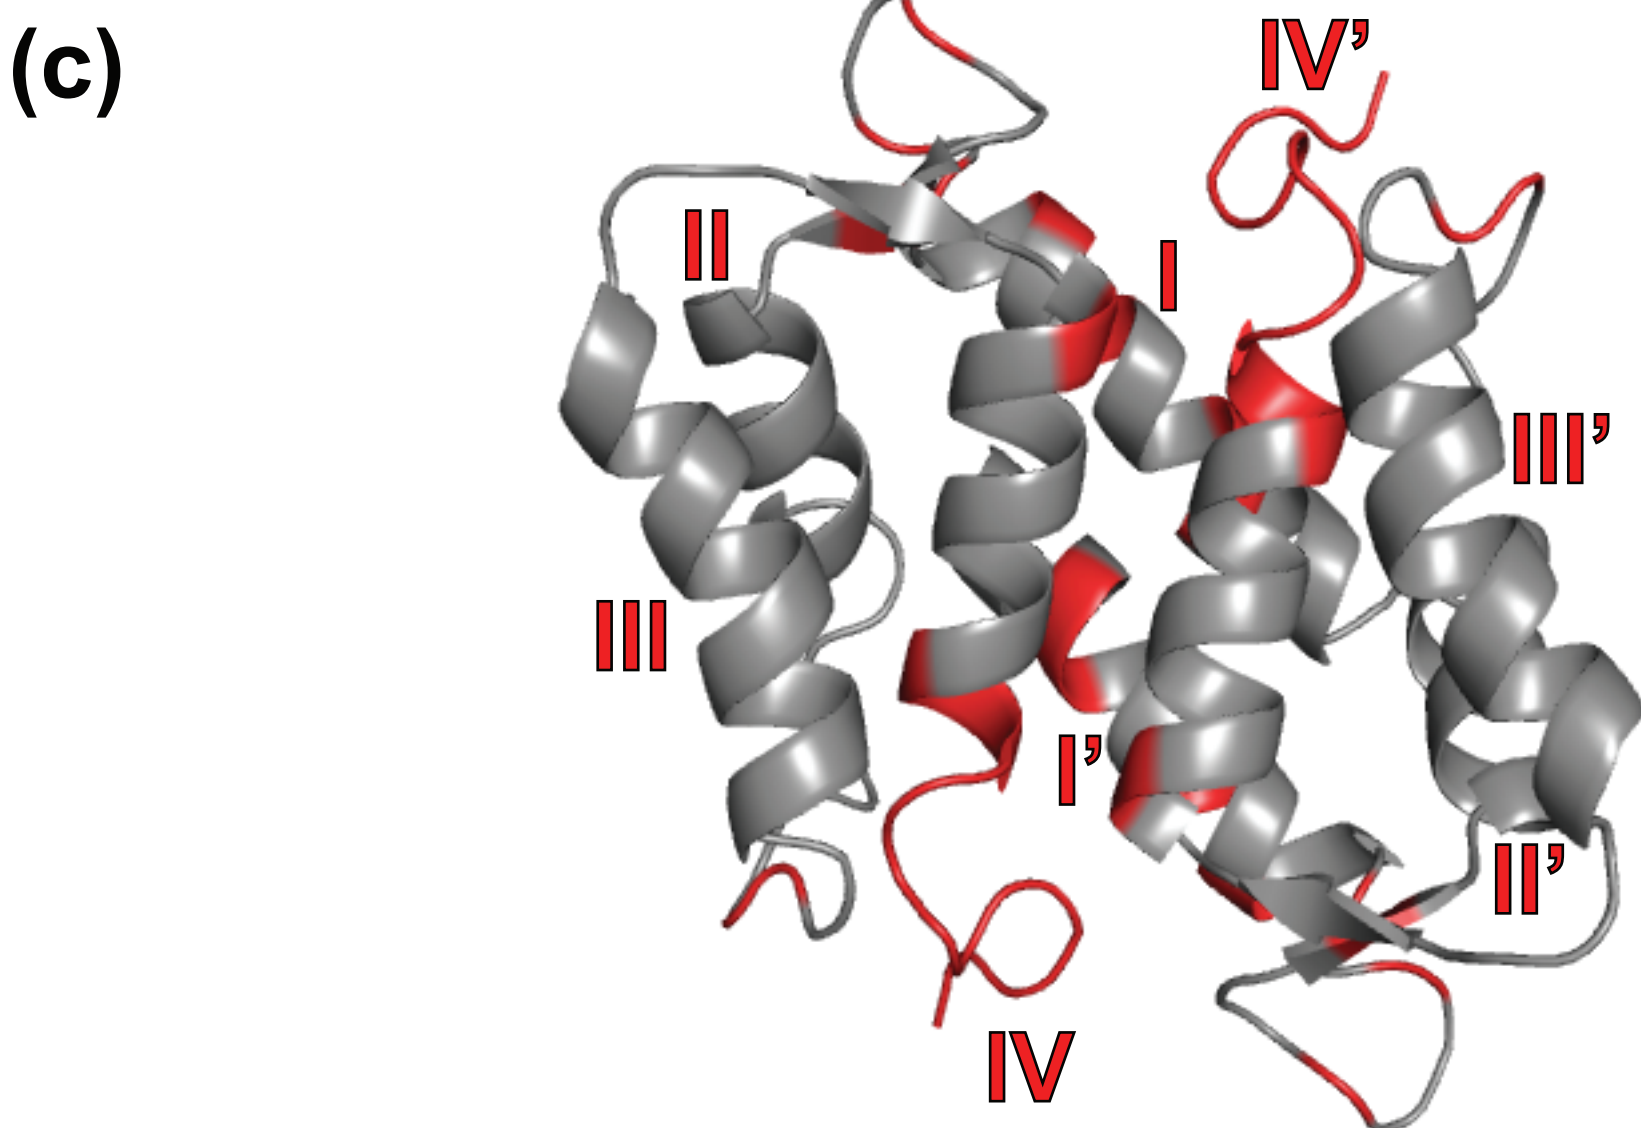

Supplement: NIHMS401518-supplement-06.pdf [file NIHMS401518-supplement-06.pdf]

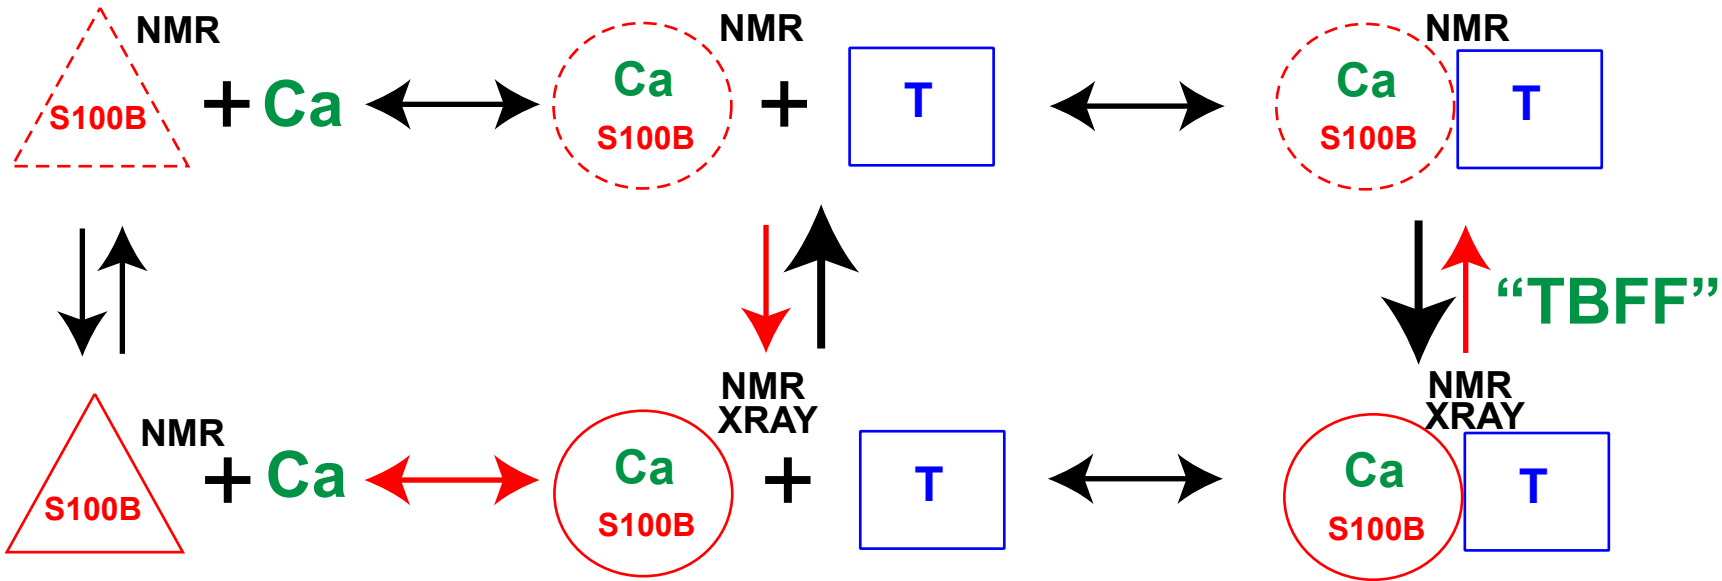

Supplement: NIHMS401518-supplement-07.pdf [file NIHMS401518-supplement-07.pdf]
